# Supplementary material for: Prevalence of Colorectal Neoplasia 10 or More Years After a Negative Screening Colonoscopy in 120 000 Repeated Screening Colonoscopies
Source: PubMed Central journal article supplement (PMC9857826; doi:10.1001/jamainternmed.2022.6215), 2023-01-17
Supplement: jamainternmed-e226215-s002.pdf [file jamainternmed-e226215-s002.pdf]

## Data Sharing Statement

Heisser. Prevalence of Colorectal Neoplasia 10 or More Years After a Negative Screening Colonoscopy. *JAMA Intern Med.* Published January 17, 2023.  
doi:10.1001/jamainternmed.2022.6215

### Data

**Data available:** No
